# Supplementary material for: Aptamer Embedded Arch-Cruciform DNA Assemblies on 2-D VS2 Scaffolds for Sensitive Detection of Breast Cancer Cells
Source: MDPI journal article supplement (doi:10.3390/bios11100378), 2021-10-08
Supplement: s1 [file s1]

## Supplementary Materials

# Aptamer Embedded Arch-Cruciform DNA Assemblies on 2-D VS<sub>2</sub> Scaffolds for Sensitive Detection of Breast Cancer Cells

Jinfeng Quan 1<sup>†</sup>, Yihan Wang 1<sup>†</sup>, Jialei Zhang 1, Kejing Huang 2, Xuemei Wang 1\*, Hui Jiang 1\*

<sup>1</sup> State Key Laboratory of Bioelectronics, National Demonstration Center for Experimental Biomedical Engineering Education, School of Biological Science and Medical Engineering, Southeast University, Nanjing 210096, P. R. China

<sup>2</sup> School of Chemistry and Chemical Engineering, Guangxi University for Nationalities, Nanning 530008, China

<sup>†</sup> These authors are contributed equally to this work.

\* Correspondence: E-mail address: xuemei@seu.edu.cn (X. Wang); sungi@seu.edu.cn (H. Jiang).

### Signal amplification of AuNPs/VS<sub>2</sub> and VS<sub>2</sub>

In order to confirm that AuNPs/VS<sub>2</sub> plays a role of signal amplification in the preparation of the sensor, the effective specific surface areas of GCE and AuNPs/VS<sub>2</sub>/GCE are measured by the chronocoulometry (Q-t), and the formula is:

$$Q = 2nFAcD^{1/2}t^{1/2} / \pi^{1/2} + Q_{dl} + Q_{ads} \quad (1)$$

Where Q is the quantity of electricity, n is the electron transfer number involved in the electrochemical reaction. A (cm<sup>2</sup>) and c (mol/dm<sup>3</sup>) means the effective area of the electrode and the concentration of the substrate, respectively. D (cm<sup>2</sup>/s) represents the diffusion coefficient, and it of potassium ferricyanide is 7.6×10<sup>-12</sup> cm<sup>2</sup>/s. Q<sub>dl</sub> (C) is a double-layer charge and Q<sub>ads</sub> (C) is an adsorption charge. According to the calculation in Fig. S1A, the effective specific surface areas of GCE and AuNPs/VS<sub>2</sub>/GCE are 0.075 cm<sup>2</sup> and 0.194 cm<sup>2</sup>, respectively. It is confirmed that AuNPs/VS<sub>2</sub> greatly improves the effective specific surface area of the electrode, thus providing more active sites to immobilize arch DNA and playing the role of signal amplification.

Two different DPV responses with a target cell concentration of 5000 cells/mL is shown in Fig. S1B. The measurement is carried out in 0.1 mol/L PBS (pH=5.0) containing 1.8 mmol/L H<sub>2</sub>O<sub>2</sub> and 2 mmol/L HQ. Curve a represents DPV response of HRP/target cell/cruciform DNA/MCH/arch-DNA structure/AuNPs/GCE. On the basis of curve a, VS<sub>2</sub> is modified on the surface of electrode (curve b). It can be observed that the DPV signal of AuNPs/VS<sub>2</sub> modified GCE is 153.8% of the AuNPs modified GCE, indicating that VS<sub>2</sub> contribute to the signal amplification.

### Cytotoxicity and electrophoresis experiments

CCK-8 kit was used to detect the cytotoxicity of DNA assemblies at different concentrations (0 ~ 2 μmol/L) [1]. The toxic effects of arch DNA and cruciform DNA on MCF-7 are detected to be very low, and the cell viability can still be maintained above 90% when the concentration is 2 μmol/L (Fig. S2A).

The assembly of cruciform DNA is validated by natural polyacrylamide gel electrophoresis (PAGE) (Fig. S2B). Lane 1 to 4, lane 5 to 6 and lane 7 to 8 are the results of four single stranded DNA, mixture of two single stranded DNA, and mixture of three single stranded DNA, respectively. When the four single stranded DNA are mixed (lane 9), a band with slower migration than any other mixed DNA are observed, proving the successful preparation of cruciform DNA [2].

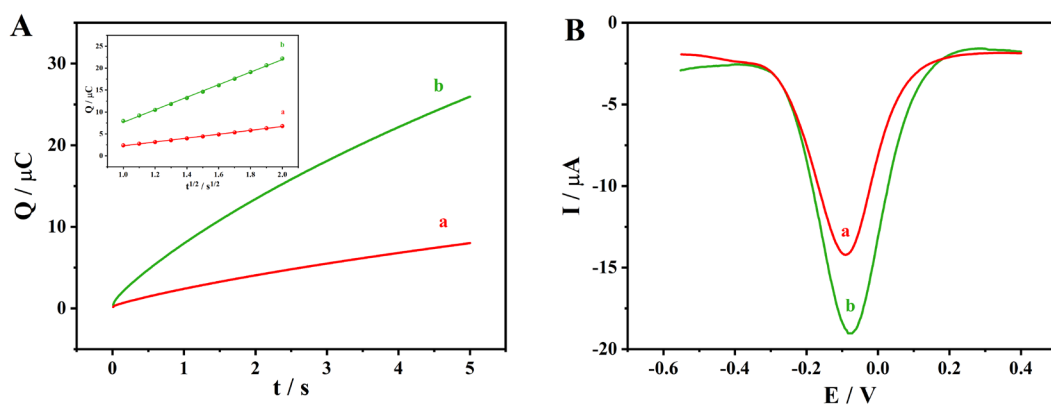

**Figure S1** Signal amplification of nanocomposites: (A) Q-t curves of GCE and AuNPs/VS<sub>2</sub>/GCE, with Q- $t^{1/2}$  curves of GCE and AuNPs/VS<sub>2</sub>/GCE in the inner illustration; (B) The DPV responses of HRP/target cell/cruciform DNA/MCH/arch-DNA structure/AuNPs/GCE (a) and HRP/target cell/cruciform DNA/MCH/arch-DNA structure/AuNPs/VS<sub>2</sub>/GCE (b).

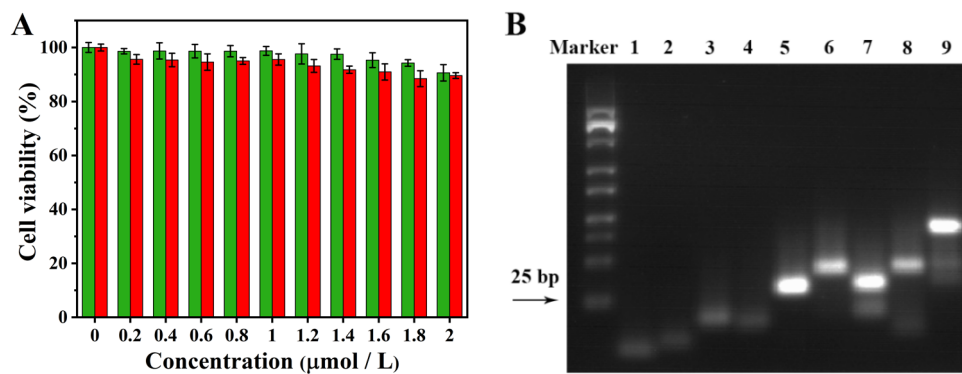

**Figure S2** (A) Cytotoxicity test of arch DNA (green) and cruciform DNA (red); (B) Cruciform DNA electrophoresis. Lane 1-9: DNA1, DNA2, DNA3, DNA4, DNA1+DNA2, DNA3+DNA4, DNA1+DNA2+DNA3, DNA2+DNA3+DNA4, DNA1+DNA2+DNA3+DNA4.

Table S1 DNA sequences

| Name | Sequence (5'-3')                                                                                |
|------|-------------------------------------------------------------------------------------------------|
| DNA1 | <b>biotin</b> -GGCAAGCTAATGGTGAGCACGGCAGG                                                       |
| DNA2 | <b>biotin</b> -CCTGCCGTGCTCACCGAATGCTAGGG                                                       |
| DNA3 | <b>biotin</b> -CCCTAGCATTCGGACTATGGCATGAGTTAGGATCAACTGC                                         |
| DNA4 | CCAGGGTATCCATCTCATGCCATAGTCCATTAGCTTGCC                                                         |
| S1   | <b>SH</b> -(CH <sub>2</sub> ) <sub>6</sub> -TCGGATGACATGCAGTTGATCCTTTGGATACCCTGGTAGGCGATTAAAGTA |
| S2   | <b>SH</b> -(CH <sub>2</sub> ) <sub>6</sub> -TAAGCTTTAGCCTTTACTTAATCGCCTA                        |

Table S2 List of instruments

| Instrument                  | Instrument model   | Manufacturer or place of origin        |
|-----------------------------|--------------------|----------------------------------------|
| Electrochemical workstation | Autolab PGSTAT302N | Netherlands                            |
| Electrophoresis             | JY300              | Beijing Junyi Oriental Electrophoresis |
| Gel imaging analyzer        | JS-680D            | Shanghai Peiqing Technology Co., Ltd   |
| SEM                         | Zeiss Ultra Plus   | Germany                                |
| TEM                         | JEM 2100           | Japan                                  |
| XPS                         | Thermo ESCALAB 250 | USA                                    |
| XRD                         | SCXmini            | Science of Japan Co., Ltd              |
| Raman Spectroscopy          | Renishaw inVia     | United Kingdom                         |

SEM: scanning electron microscope; TEM: transmission electron microscope; XPS: X-ray photoelectron spectroscopy; XRD: X-ray diffractometer.

Table S3 Experimental conditions and electrochemical parameters

| Method | Electrolyte                                                                                          | Parameters                                                          |
|--------|------------------------------------------------------------------------------------------------------|---------------------------------------------------------------------|
| CV     | 0.1 mol/L PBS (pH=7.0) including 10 mmol/L [Fe(CN) <sub>6</sub> ] <sup>3-/4-</sup> and 0.1 mol/L KCl | voltage range: -0.2 V ~ 0.6 V<br>sweep speed: 100 mV/s              |
| EIS    | 0.1 mol/L PBS (pH=7.0) including 5 mmol/L [Fe(CN) <sub>6</sub> ] <sup>3-/4-</sup> and 0.1 mol/L KCl  | amplitude: 5 mV<br>frequency: 0.1 Hz ~ 100 kHz<br>voltage: 0.2 V    |
| DPV    | 0.1 mol/L PBS (pH=5.0) including 1.8 mmol/L H <sub>2</sub> O <sub>2</sub> and 2 mmol/L HQ            | pulse amplitude: 50 mV<br>pulse width: 50 ms<br>pulse period: 0.2 s |
| CC     | 1.0 mol/L KCl including 0.1 mmol/L [Fe(CN) <sub>6</sub> ] <sup>3-</sup>                              | time: 5 s                                                           |
| I-t    | 0.1 mol/L KNO <sub>3</sub> including 0.1% HAuCl <sub>4</sub>                                         | deposition voltage: -0.2 V<br>deposition time: 25 s                 |

CV: cyclic voltammetry; EIS: electrochemical impedance spectroscopy; DPV: differential pulse voltammetry; CC: chronometric.

## References

- Dong, H. L.; Chen, H. F.; Jiang, J. Q.; Zhang, H.; Cai, C. X.; Shen, Q. M., Highly Sensitive Electrochemical Detection of Tumor Exosomes Based on Aptamer Recognition-Induced Multi-DNA Release and Cyclic Enzymatic Amplification. *Anal Chem* **2018**, *90* (7), 4507-4513.
- Wang, D.; Chai, Y. Q.; Yuan, Y. L.; Yuan, R., Lattice-Like DNA Tetrahedron Nanostructure as Scaffold to Locate GOx and HRP Enzymes for Highly Efficient Enzyme Cascade Reaction. *ACS Appl Mater Inter* **2020**, *12* (2), 2871-2877.
